# Supplementary material for: Low power density, high-efficiency reflective Raman system for polymer SERS substrates
Source: Royal Society of Chemistry journal article supplement (doi:10.1039/d4ra03874f), 2024-01-01

## Supporting information

### Low power density, high-efficiency Reflective Raman system for polymer SERS substrates

Lin Ding-Zheng,<sup>\*a</sup> Heng-I Chang,<sup>a</sup> Kai-Chun Tsia,<sup>a</sup> Yu-Ya Chung<sup>a</sup>

<sup>a</sup> Department of Mechanical Engineering, National Taiwan University of Science and Technology, Taiwan, R.O.C.

\*E-mail: djsam@mail.ntust.edu.tw

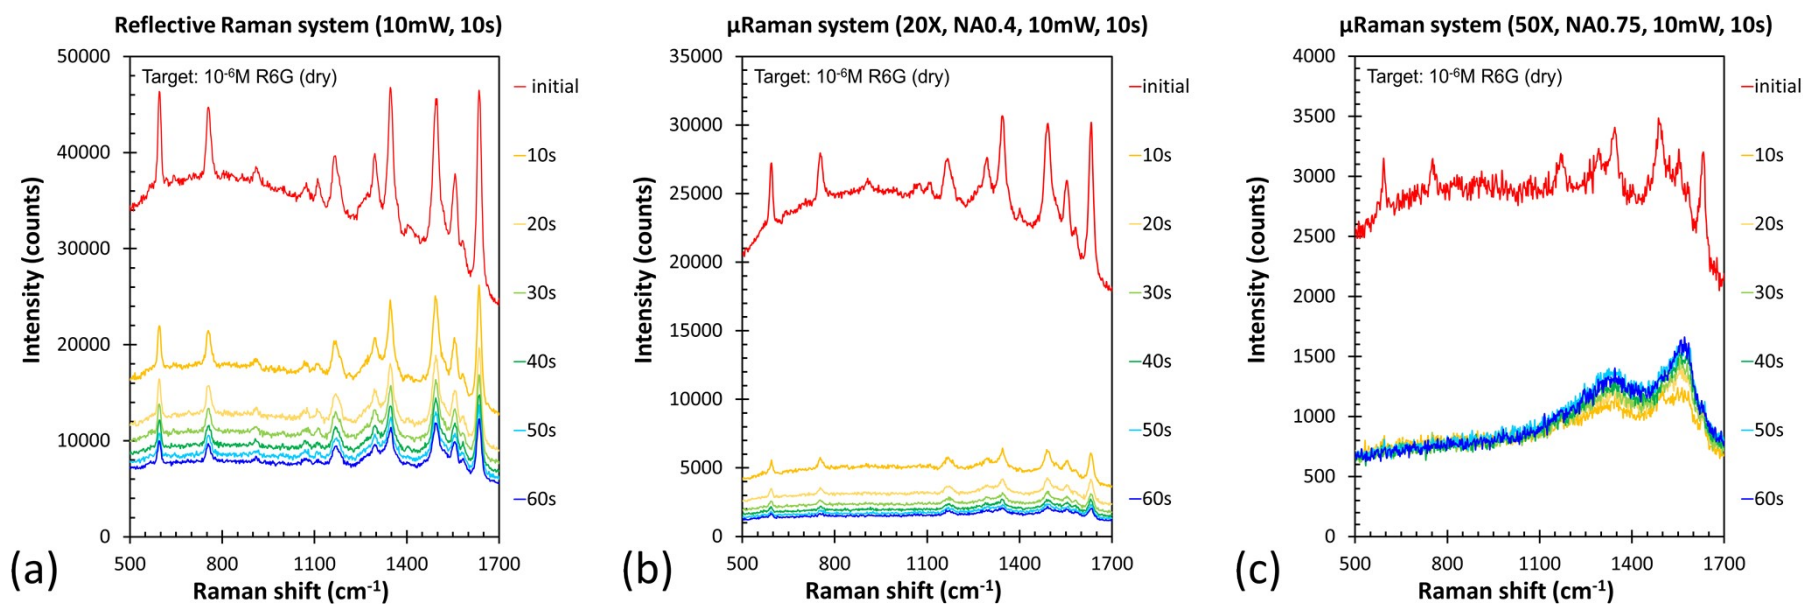

Fig. S1 The time dependence Raman spectra of  $10^{-6}$  M R6G on polymer SERS substrate by (a) RR system, (b) 20X, NA0.4  $\mu$ -Raman system, and (c) 50X, NA0.75  $\mu$ -Raman system. The 532nm laser power is 10 mW, and the integration time is 10 seconds.

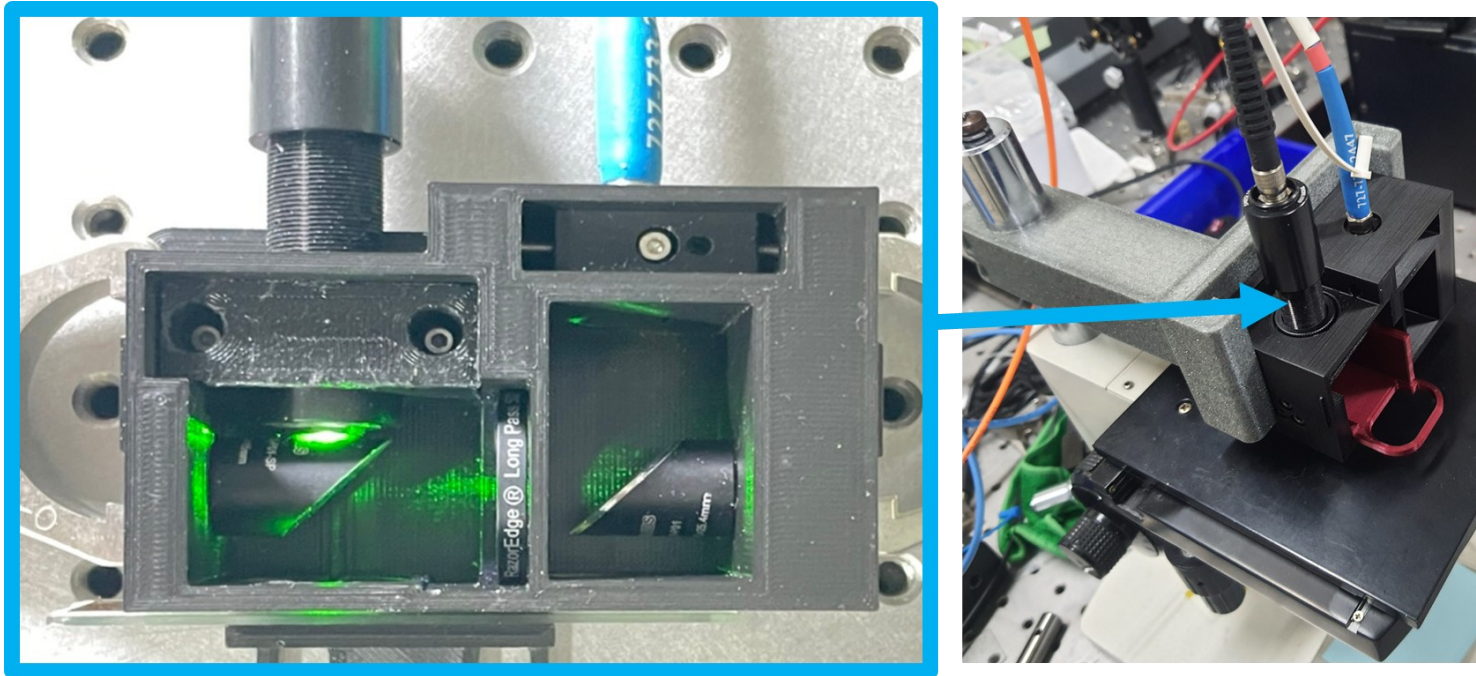

Fig. S2 The picture of our home-built RR system

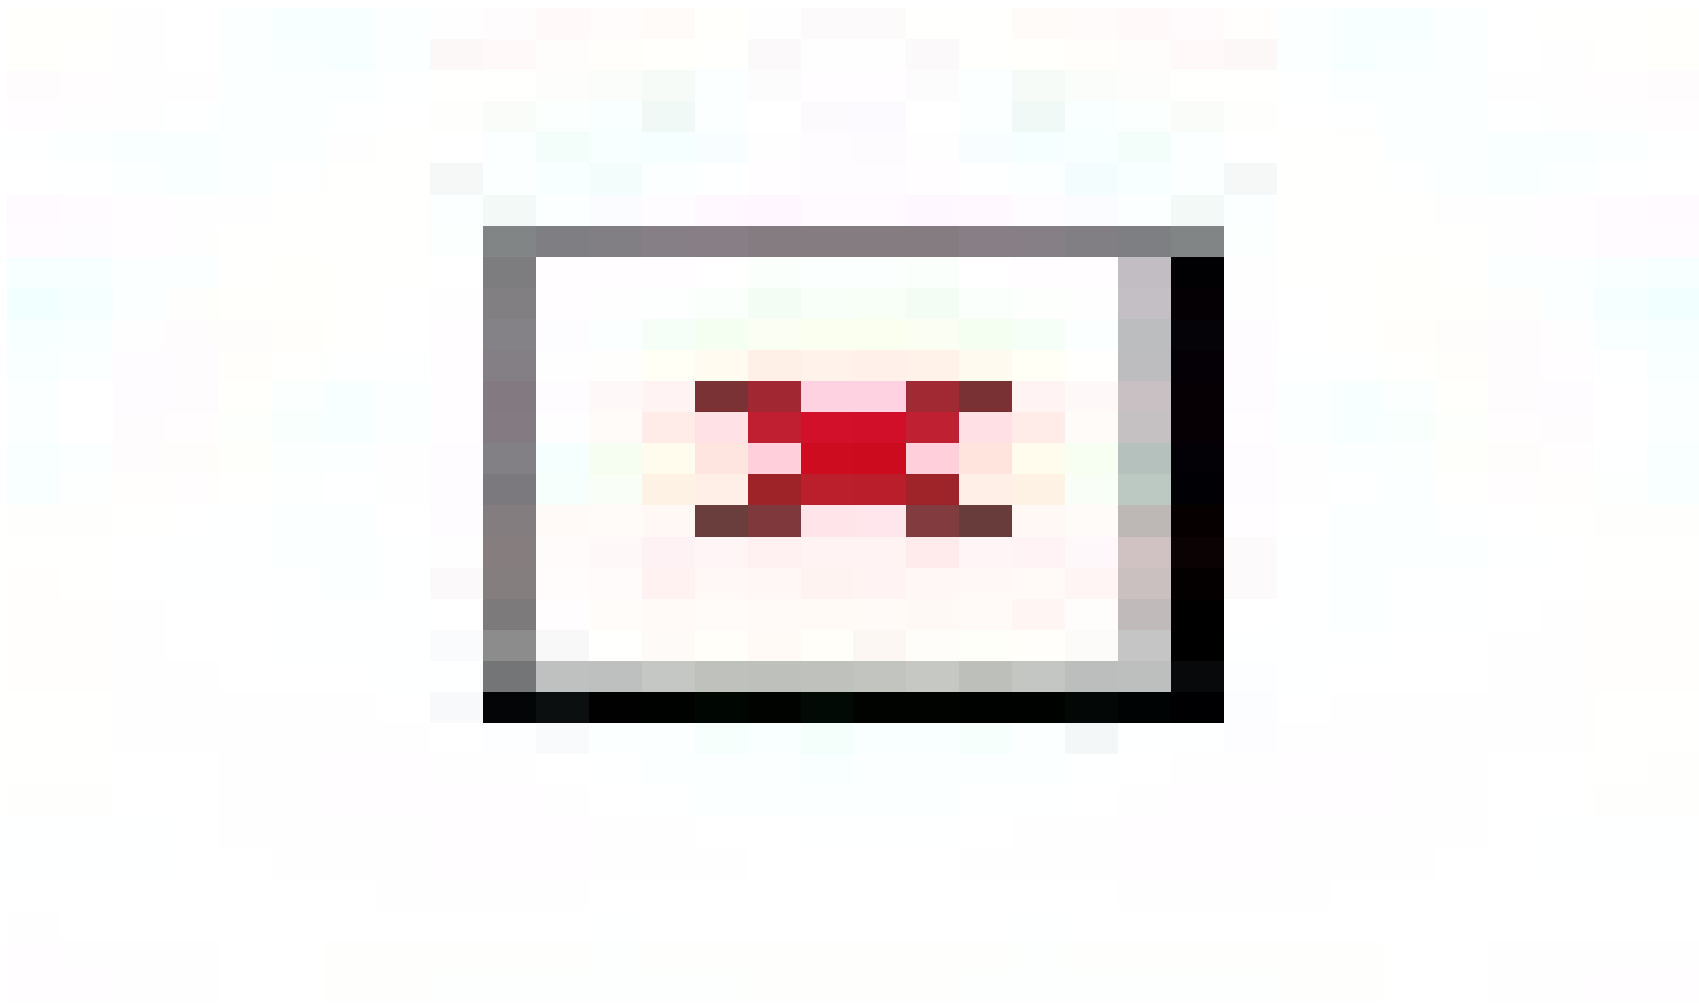

Fig. S3 The regression line of the Raman signal on polymer SERS substrate and the slope ratio between RR and  $\mu$ -Raman systems

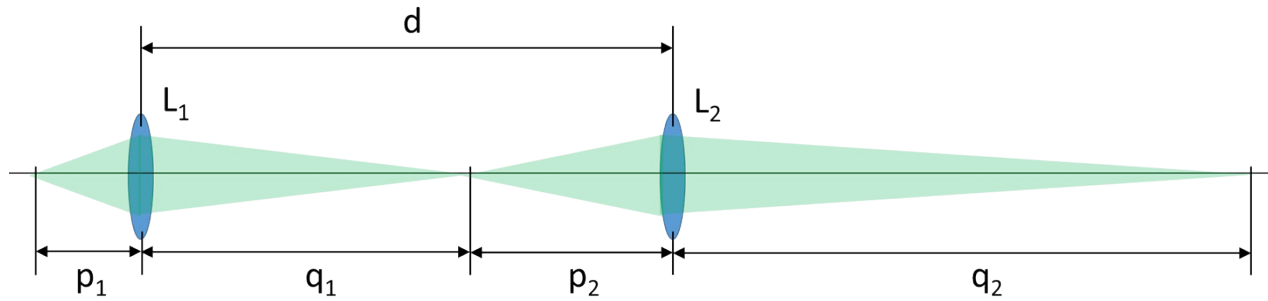

$$\frac{1}{p_1} + \frac{1}{q_1} = \frac{1}{f_1} \quad \text{①}$$

$$\frac{1}{p_2} + \frac{1}{q_2} = \frac{1}{f_2} \quad \text{②}$$

$$p_2 = d - q_1 \quad \text{③}$$

Based on the above image formation equation, if the focal length of the 1<sup>st</sup> and the 2<sup>nd</sup> aspherical lenses is 6.2mm ( $f_1$ ) and 18.4 mm ( $f_2$ ), and the core diameter of the fiber laser is 105  $\mu\text{m}$ , we can calculate the magnifications and focusing spot diameters on sample surface listed in Table S2. We can adjust the spot diameter in the range of 2.22~2.78 times the fiber core size. In this article, we selected  $p_1$  close to 6 mm, and the theoretical spot size on the sample plane is about 275  $\mu\text{m}$ .

Table. S1 Relation of spot size and lens position parameters.

| $p_1$<br>(mm) | $d$<br>(mm)  | $q_1$<br>(mm)  | $p_2$<br>(mm) | $q_2$<br>(mm) | magnification | spot diameter<br>( $\mu\text{m}$ ) |
|---------------|--------------|----------------|---------------|---------------|---------------|------------------------------------|
| 6.10          | 50.49        | -378.20        | 428.69        | 19.23         | -2.78         | 292                                |
| 6.05          | 50.50        | -250.07        | 300.57        | 19.60         | -2.70         | 283                                |
| <b>6.00</b>   | <b>50.51</b> | <b>-186.00</b> | <b>236.51</b> | <b>19.95</b>  | <b>-2.62</b>  | <b>275</b>                         |
| 5.95          | 50.52        | -147.56        | 198.08        | 20.28         | -2.54         | 267                                |
| 5.90          | 50.53        | -121.93        | 172.46        | 20.60         | -2.47         | 259                                |
| 5.85          | 50.54        | -103.63        | 154.17        | 20.89         | -2.40         | 252                                |
| 5.80          | 50.55        | -89.90         | 140.45        | 21.17         | -2.34         | 245                                |
| 5.75          | 50.56        | -79.22         | 129.78        | 21.44         | -2.28         | 239                                |
| 5.70          | 50.57        | -70.68         | 121.25        | 21.69         | -2.22         | 233                                |

Table. S2 Components list of RR system

| #  | Component                                                                           | Part number                 |
|----|-------------------------------------------------------------------------------------|-----------------------------|
| 1  | Fiber port (from laser)                                                             | Thorlabs, SM05FC            |
| 2  | 1 <sup>st</sup> aspherical lens                                                     | Thorlabs, C171TMD-A         |
| 3  | Laser-line filter                                                                   | Semrock, LL01-532-12.5      |
| 4  | 2 <sup>nd</sup> aspherical lens                                                     | Thorlabs, C280TMD-A         |
| 5  | 1 <sup>st</sup> 90° off-axis parabolic mirror with a drilled hole<br>(0.5", f=15mm) | Thorlabs, MPD00M9-P01-SP    |
| 6  | Sample (ex: silicon)                                                                | Mesophotonics, Klarite sCAL |
| 7  | Long-pass filter                                                                    | Semrock, LP03-532RU-25      |
| 8  | 2 <sup>nd</sup> 90° off-axis parabolic mirror<br>(0.5", f=33mm)                     | Thorlabs, MPD01M9-P01       |
| 9  | Fiber port (to spectrometer)                                                        | Thorlabs, SM05SMA           |
| 10 | Adjustable lens tube                                                                | SM05V10 + SM05L10           |

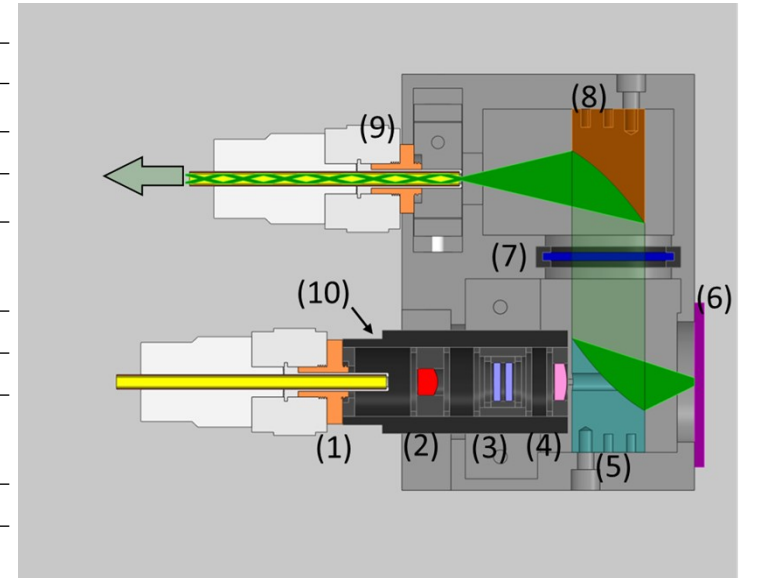

Supplement: d4ra03874f1.pdf [file d4ra03874f1.pdf]
